# Supplementary material for: Personalized Prediction of Postconcussive Working Memory Decline: A Feasibility Study
Source: J Pers Med. 2022 Jan 31;12(2):196. doi: 10.3390/jpm12020196 (PMC8878610; doi:10.3390/jpm12020196)
Supplement: Supplementary file 1 [file jpm-12-00196-s001.zip › jpm-1532882-supplementary.pdf]

## Supplementary Materials

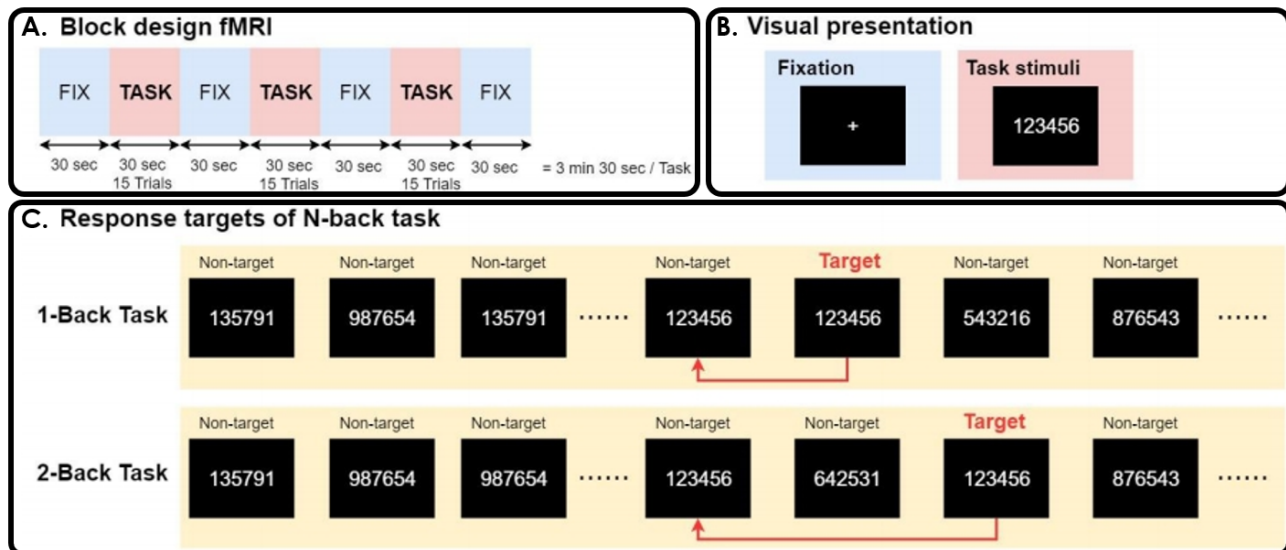

**Figure S1. N-back WM task diagram.**

(A) *N*-back task contains three epochs, (B) each composed of a 30-second task period and a 30-second fixing on a crosshair. The interstimulus interval between each trial during a task period was 2 s. In total, 45 trials were conducted, with each task consisting of 80% nontarget trials and 20% target trials. (C) In each run of the *N*-back tasks, participants were instructed to pay attention to a series of six-digit numerical stimuli and respond when the presented number matched the number presented *N* items before (*N* = 1 or 2).

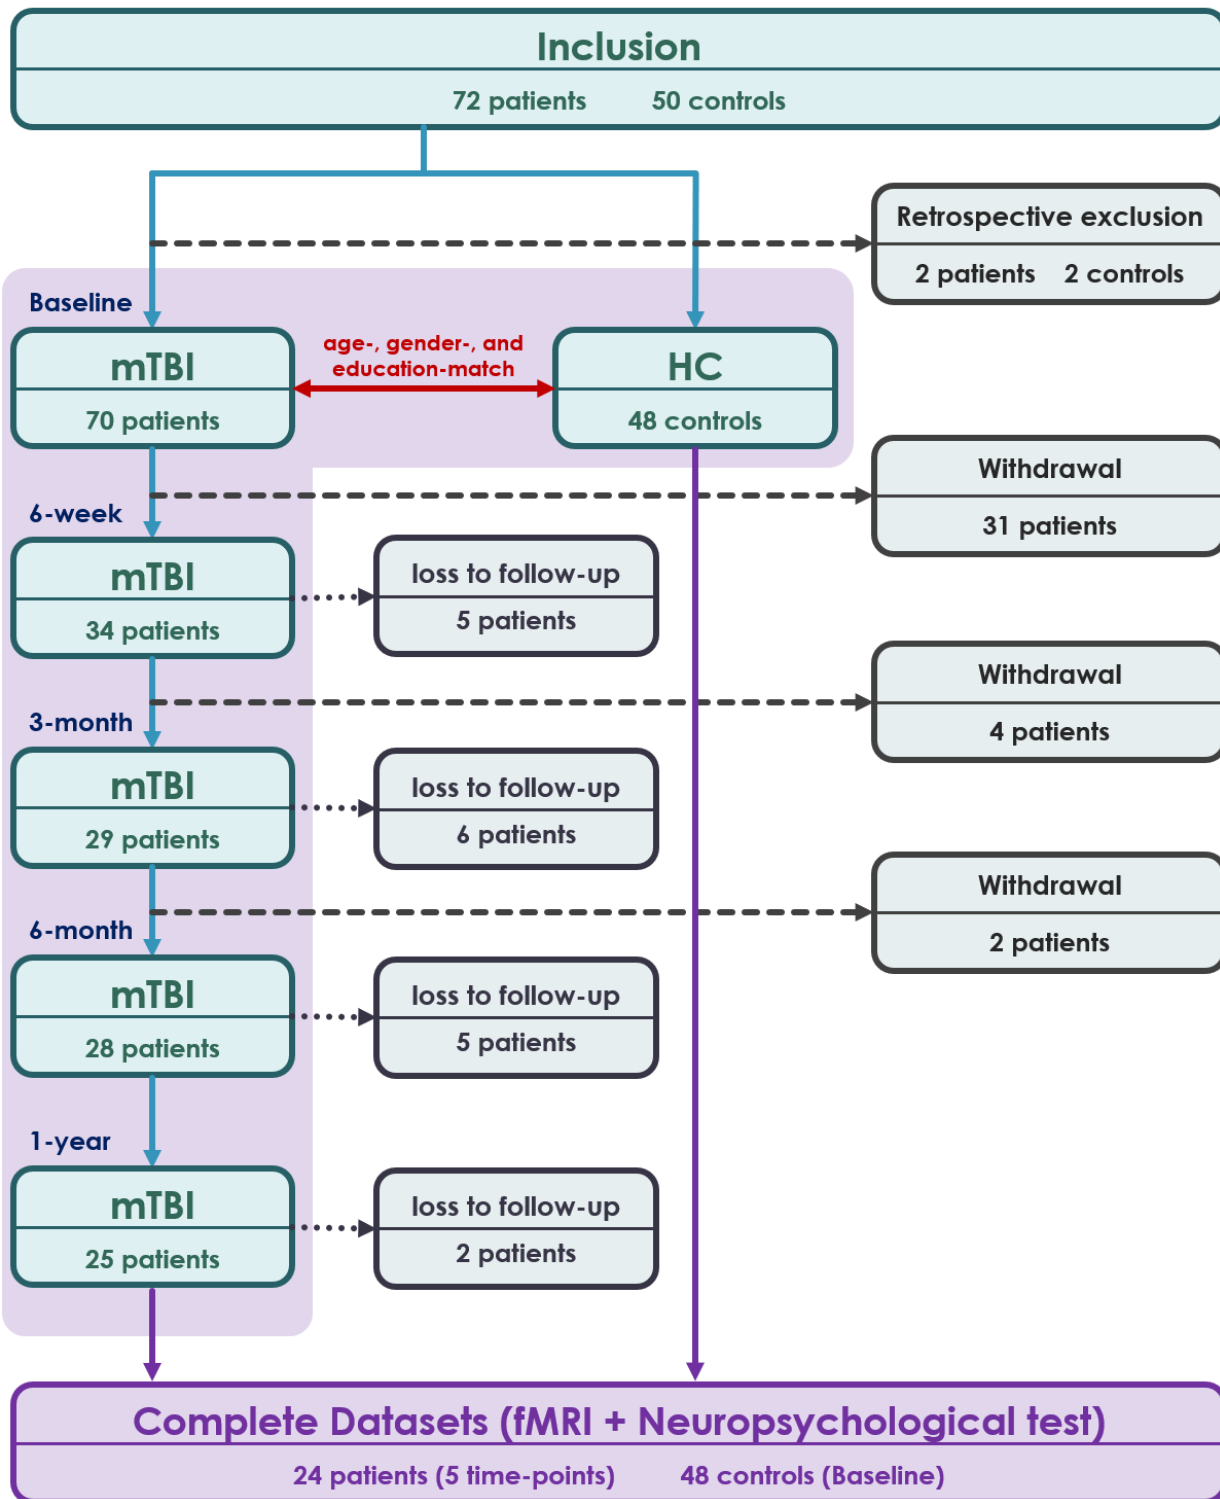

**Figure S2. Flow chart.**

Flow chart of participant inclusion and exclusion in this study.

**Table S1. WM 2-back task-induced activation and deactivation peak regions among all participants**

|                       | Brain Regions | Side | MNI   |       |       | Area<br>(mm^3) | t value |        |
|-----------------------|---------------|------|-------|-------|-------|----------------|---------|--------|
|                       |               |      | X     | Y     | Z     |                | HC      | mTBI   |
| Basal Ganglia         | Caudate       | L    | -15   | -1.5  | 16.5  | 2207           | 11.15   | 9.92   |
|                       | Caudate       | R    | 15    | -1.5  | 16.5  | 2707           | 10.44   | 11.19  |
|                       | Putamen       | L    | -19.5 | 6     | 12    | 857            | 5.56    | 5.89   |
|                       | Putamen       | R    | 19.5  | 6     | 12    | 780            | 6.61    | 7.76   |
| Cerebellum            | CRB crus1     | L    | -7.5  | -78   | -25.5 | 5798           | 12.94   | 9.65   |
|                       | CRB crus1     | R    | 6     | -75   | -28.5 | 2953           | 12.20   | 9.34   |
|                       | CRB6          | L    | -28.5 | -63   | -25.5 | 10419          | 13.27   | 9.85   |
|                       | CRB6          | R    | 7.5   | -75   | -21   | 11684          | 15.09   | 8.65   |
|                       | CRB4.5        | L    | -4.5  | -61.5 | -16.5 | 881            | 6.52    | 4.49   |
|                       | CRB4.5        | R    | 12    | -57   | -16.5 | 1310           | 6.71    | 4.42   |
|                       | CRB10         | L    | -25.5 | -31.5 | -42   | 874            | 6.20    | 0.87   |
|                       | CRB10         | R    | 22.5  | -36   | -45   | 888            | 6.34    | 3.53   |
| Task Positive Network | dIPFC         | R    | 37.5  | 55.5  | 12    | 10625          | 7.35    | 5.24   |
|                       | dIPFC         | L    | -37.5 | 55.5  | 12    | 7277           | 7.52    | 2.94   |
|                       | FEF           | R    | 31.5  | 6     | 60    | 8289           | 11.54   | 8.79   |
|                       | FEF           | L    | -31.5 | 6     | 60    | 6311           | 9.50    | 6.01   |
|                       | IFG(orb.)     | R    | 48    | 12    | 33    | 6483           | 14.43   | 8.96   |
|                       | IFG(orb.)     | L    | -39   | 7.5   | 30    | 3260           | 13.80   | 10.53  |
|                       | IFG(tri.)     | R    | 46.5  | 43.5  | 21    | 17135          | 6.18    | 3.66   |
|                       | IFG(tri.)     | L    | -46.5 | 30    | 31.5  | 30463          | 7.77    | 4.86   |
|                       | SPL           | L    | -25.5 | -61.5 | 43.5  | 8127           | 15.13   | 12.81  |
|                       | SPL           | R    | 34.5  | -58.5 | 51    | 6318           | 13.67   | 10.25  |
|                       | IPS           | L    | -36   | -51   | 45    | 12572          | 15.31   | 10.62  |
|                       | IPS           | R    | 36    | -51   | 45    | 8451           | 17.08   | 12.14  |
|                       | TPJ           | L    | -51   | -40.5 | 21    | 2028           | 5.14    | 5.18   |
|                       | TPJ           | R    | 60    | -34.5 | 21    | 2565           | 5.06    | 2.26   |
|                       | rolandicoper. | L    | -48   | 9     | 1.5   | 479            | 6.44    | 2.22   |
|                       | rolandicoper. | R    | 51    | 7.5   | 16.5  | 284            | 6.68    | 6.16   |
|                       | ITG           | L    | -45   | -64.5 | -9    | 5599           | 7.79    | 6.10   |
|                       | ITG           | R    | 51    | -57   | -19.5 | 9619           | 3.20    | 1.21   |
|                       | Calcarine     | L    | -13.5 | -90   | -6    | 4023           | 14.73   | 8.62   |
|                       | Calcarine     | R    | 13.5  | -90   | -3    | 2440           | 7.51    | 8.21   |
|                       | SMA           | L    | -3    | 15    | 52.5  | 10689          | 16.89   | 11.41  |
|                       | SMA           | R    | 1.5   | 9     | 61.5  | 8846           | 10.33   | 9.41   |
|                       | dACC          | L    | -1    | 36    | 30    | 854            | 5.76    | 4.71   |
|                       | dACC          | R    | 7.5   | 25.5  | 30    | 2393           | 11.88   | 6.62   |
|                       | AINS          | L    | -30   | 22.5  | 4.5   | 5073           | 16.62   | 13.93  |
|                       | AINS          | R    | 31.5  | 24    | 3     | 4330           | 19.50   | 14.85  |
| Task Negative Network | PINS          | L    | -36   | -19.5 | 19.5  | 1397           | -9.33   | -8.42  |
|                       | PINS          | R    | 37.5  | -12   | 19.5  | 2612           | -12.10  | -9.92  |
|                       | amyg.         | L    | -21   | -6    | -16.5 | 668            | -6.14   | -4.46  |
|                       | amyg.         | R    | 27    | -1.5  | -19.5 | 419            | -4.24   | -4.40  |
|                       | MCC           | L    | -7.5  | -28.5 | 43.5  | 6173           | -8.20   | -7.37  |
|                       | MCC           | R    | 12    | -22.5 | 48    | 4577           | -6.39   | -5.06  |
|                       | PCC           | L    | -4.5  | -49.5 | 30    | 2514           | -13.33  | -13.06 |
|                       | PCC           | R    | 6     | -48   | 30    | 1407           | -13.27  | -10.56 |
|                       | aPFC          | L    | 1.5   | 51    | -7.5  | 3871           | -7.66   | -7.00  |
|                       | aPFC          | R    | -6    | 46.5  | -10.5 | 9430           | -6.88   | -5.48  |
|                       | rmPFC         | L    | 1.5   | 40.5  | -15   | 5123           | -11.39  | -6.71  |
|                       | rmPFC         | R    | -3    | 48    | -10.5 | 7239           | -10.51  | -6.60  |
|                       | vmPFC         | L    | 1.5   | 19.5  | -18   | 1299           | -5.05   | -0.18  |
|                       | vmPFC         | R    | -3    | 24    | -6    | 1775           | -5.48   | -3.43  |
|                       | angular       | L    | 46.5  | -76.5 | 28.5  | 4475           | -2.49   | -1.45  |
|                       | angular       | R    | -46.5 | -72   | 28.5  | 7911           | -8.01   | -7.22  |
|                       | IFC           | L    | -28.5 | 3.5   | -10.5 | 2477           | -6.40   | -0.31  |
|                       | IFC           | R    | 19.5  | 22.5  | -19.5 | 827            | -3.18   | -0.68  |
|                       | MTG           | L    | -45   | -67.5 | 24    | 6406           | -7.63   | -7.47  |
|                       | MTG           | R    | 48    | -75   | 24    | 3898           | -3.69   | -2.45  |
|                       | Hippo.        | L    | -24   | -18   | -18   | 4860           | -8.06   | -6.30  |
|                       | Hippo.        | R    | 27    | -18   | -18   | 3054           | -8.35   | -5.64  |

cerebellum; dACC = dorsal anterior cingulate cortex; dlPFC = dorsolateral prefrontal cortex; FEF = frontal eye fields; Hippo. = hippocampus; IFC = inferior frontal cortex; IFG = inferior frontal gyrus; IPS = inferior parietal sulcus; ITG = inferior temporal gyrus; L = left; MCC = middle cingulate cortex; MTG = middle temporal gyrus; Orb. = orbitalis; PCC = posterior cingulate cortex; R = right; rmPFC = rostro-medial prefrontal cortex; Rolandicoper. = Rolandic operculum; SMA = supplementary motor area; SPL = superior parietal lobe; TPJ = temporal parietal junction; Tri. = triangularis; vmPFC = ventromedial prefrontal cortex; fMRI = functional magnetic resonance imaging; mTBI = mild traumatic brain injury; WM = working memory; MRI = magnetic resonance imaging; PCS = postconcussive symptoms; HC = healthy control; MMSE = Mini-Mental State Examination; WAIS-IV = Wechsler Adult Intelligence Scale, fourth edition; WMI = WM index; AMT = arithmetic ability; DS = digit span score; SPM = Statistical Parametric Mapping; ROI = region-of-interest; SVM = support vector machine; ROC-AUC = area under receiver operating characteristic curve; DMN = default mode network.

**Table S2. Demographics, clinical and cognitive characteristics, and WM task performance of the participants**

|                   |            | HC      |   |        | mTBI    |   |           | mTBI (6w) |   |          | mTBI (3m) |   |           | mTBI (6m) |   |           | mTBI (1Y) |   |           |
|-------------------|------------|---------|---|--------|---------|---|-----------|-----------|---|----------|-----------|---|-----------|-----------|---|-----------|-----------|---|-----------|
| Sample size       |            | N = 48  |   |        | N = 70  |   |           |           |   |          | N = 24    |   |           |           |   |           |           |   |           |
| Sex (female/male) |            | 32 / 16 |   |        | 47 / 23 |   |           |           |   |          | 16 / 8    |   |           |           |   |           |           |   |           |
| Age               |            | 37.44   | ± | 12.01  | 37.94   | ± | 12.24     |           |   |          | 33.29     | ± | 9.56      |           |   |           |           |   |           |
| Education (year)  |            | 14.36   | ± | 4.41   | 14.45   | ± | 2.96      |           |   |          | 15.14     | ± | 2.20      |           |   |           |           |   |           |
| GOSE              |            | N.A.    |   |        | 6.20    | ± | 1.98      |           |   |          | 5.85      | ± | 2.18      |           |   |           |           |   |           |
| Clinical symptoms | MMSE       | 29.40   | ± | 0.76   | 28.44   | ± | 1.61 ***  | 29.05     | ± | 1.36     | 28.86     | ± | 1.46      | 28.90     | ± | 1.45      | 28.80     | ± | 1.45 *    |
|                   | PSQI       | 4.90    | ± | 2.35   | 8.07    | ± | 4.36 ***  | 7.38      | ± | 4.40 **  | 7.29      | ± | 5.43 **   | 6.10      | ± | 4.09      | 6.67      | ± | 9.45 *    |
|                   | ESS        | 5.63    | ± | 3.27   | 7.44    | ± | 4.23 *    | 6.89      | ± | 4.11     | 7.11      | ± | 4.23      | 5.85      | ± | 4.07      | 5.63      | ± | 3.32 †    |
|                   | DHI        | 5.75    | ± | 7.17   | 18.64   | ± | 22.46 *** | 12.10     | ± | 16.90 *  | 6.32      | ± | 11.97 †   | 10.48     | ± | 15.78     | 11.53     | ± | 17.35 †   |
|                   | PCSQ       | 4.92    | ± | 5.73   | 13.30   | ± | 13.43 *** | 8.24      | ± | 10.72    | 8.30      | ± | 10.77     | 4.33      | ± | 6.60 ††   | 9.03      | ± | 9.45 *    |
|                   | BAI        | 4.33    | ± | 4.80   | 9.80    | ± | 9.57 ***  | 6.25      | ± | 8.32     | 4.95      | ± | 5.46 †    | 3.90      | ± | 5.49 ††   | 7.27      | ± | 7.84 *    |
|                   | BDI        | 4.69    | ± | 4.95   | 9.70    | ± | 9.86 **   | 5.40      | ± | 7.05     | 6.63      | ± | 5.60      | 4.10      | ± | 5.35 †    | 6.97      | ± | 6.18 *    |
| WAIS - IV         | DS         | 34.28   | ± | 5.67   | 34.29   | ± | 6.50      | 34.40     | ± | 4.81     | 35.42     | ± | 5.02      | 34.08     | ± | 5.13      | 35.71     | ± | 5.27      |
|                   | Arithmetic | 16.63   | ± | 3.41   | 14.63   | ± | 4.40 **   | 15.31     | ± | 3.52 *   | 16.33     | ± | 3.43 ††   | 15.21     | ± | 4.00 *    | 15.52     | ± | 4.80 *    |
|                   | WMI        | 109.72  | ± | 12.75  | 104.54  | ± | 17.33 **  | 105.60    | ± | 12.53 *  | 108.81    | ± | 12.49 †   | 105.02    | ± | 14.07 *   | 108.63    | ± | 14.28 *   |
|                   | PSI        | 108.86  | ± | 12.24  | 95.92   | ± | 16.77 **  | 104.42    | ± | 16.61 †† | 110.69    | ± | 18.22 ††† | 111.67    | ± | 16.85 ††† | 112.94    | ± | 16.72 ††† |
| WM task           | 1b ACC (%) | 95.37   | ± | 8.52   | 90.95   | ± | 8.09      | 97.88     | ± | 10.57 †  | 91.11     | ± | 10.57     | 98.94     | ± | 3.34 ††   | 95.79     | ± | 8.09      |
|                   | 1b RT (ms) | 566.21  | ± | 114.73 | 577.31  | ± | 161.00    | 630.58    | ± | 107.52 * | 617.13    | ± | 107.52    | 601.49    | ± | 111.80    | 609.08    | ± | 77.04 *†  |
|                   | 2b ACC (%) | 71.53   | ± | 21.49  | 70.63   | ± | 26.08     | 73.54     | ± | 22.05    | 73.33     | ± | 22.05     | 76.72     | ± | 16.06     | 67.78     | ± | 20.14     |
|                   | 2b RT (ms) | 717.14  | ± | 184.38 | 783.45  | ± | 187.51    | 715.80    | ± | 211.13   | 786.17    | ± | 211.13 †  | 757.35    | ± | 123.77    | 738.39    | ± | 101.81 †  |

**Significance:**

\* indicated the significant difference compared with HC group. (\*:  $p < 0.05$ , \*\*:  $p < 0.01$ , \*\*\*:  $p < 0.001$ , FDR corrected)

† indicated the significant difference compared with the initial mTBI group. (†:  $p < 0.05$ , ††:  $p < 0.01$ , †††:  $p < 0.001$ , FDR corrected)

**Abbreviations:**

GOSE: Glasgow Outcome Scale-Extended

MMSE: Mini-Mental State Examination

PSQI: Pittsburgh Sleep Quality Index

ESS: Epworth Sleepiness Scale

DHI: Dizziness Handicap Inventory

PCSQ: Post-Concussive Symptoms Questionnaire

BAI: Beck Anxiety Inventory

BDI: Beck Depression Inventory

WAIS: Wechsler Adult Intelligence Scale

DS: Digit Span

WMI: Working Memory Index

PSI: Processing Speed Index

WM: Working Memory

ACC: Accuracy

RT: Reaction Time

FDR: False Discovery Rate
